# Supplementary material for: Tuning the visible-light photocatalytic degradation activity of thin nanosheets constructed porous g-C3N4 microspheres by decorating ionic liquid modified carbon dots: roles of heterojunctions and surface charges
Source: Royal Society of Chemistry journal article supplement (doi:10.1039/c9nj00308h), 2019-01-01
Supplement: c9nj00308h1.pdf [file c9nj00308h1.pdf]

**Tuning the visible-light photocatalytic degradation activity of thin nanosheets constructed porous g-C<sub>3</sub>N<sub>4</sub> microspheres by decorating ionic liquid modified carbon dots: roles of heterojunctions and surface charges**

Bin Zhao<sup>a</sup>, Baogang Wang<sup>a\*</sup>, Hongsheng Lu<sup>a</sup>, Shanshan Dai<sup>a</sup> and Zhiyu Huang

<sup>a</sup> *College of Chemistry and Chemical Engineering, Southwest Petroleum University, Chengdu 610500, P. R. China*

---

\* Corresponding authors. E-mail: bgwang@swpu.edu.cn; Fax: +86-28-83037330; Tel: +86-28-83037330

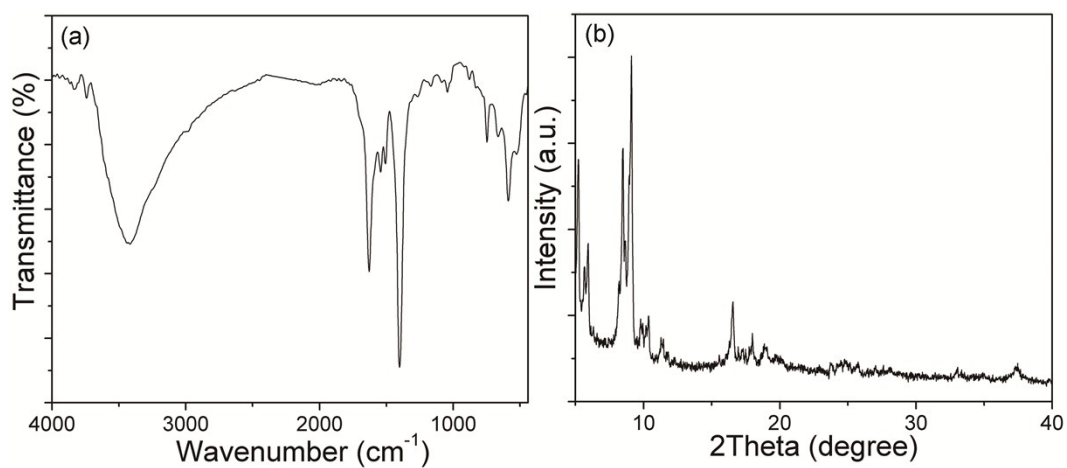

**Fig. S1** (a) FTIR spectrum and (b) XRD pattern of MOF.

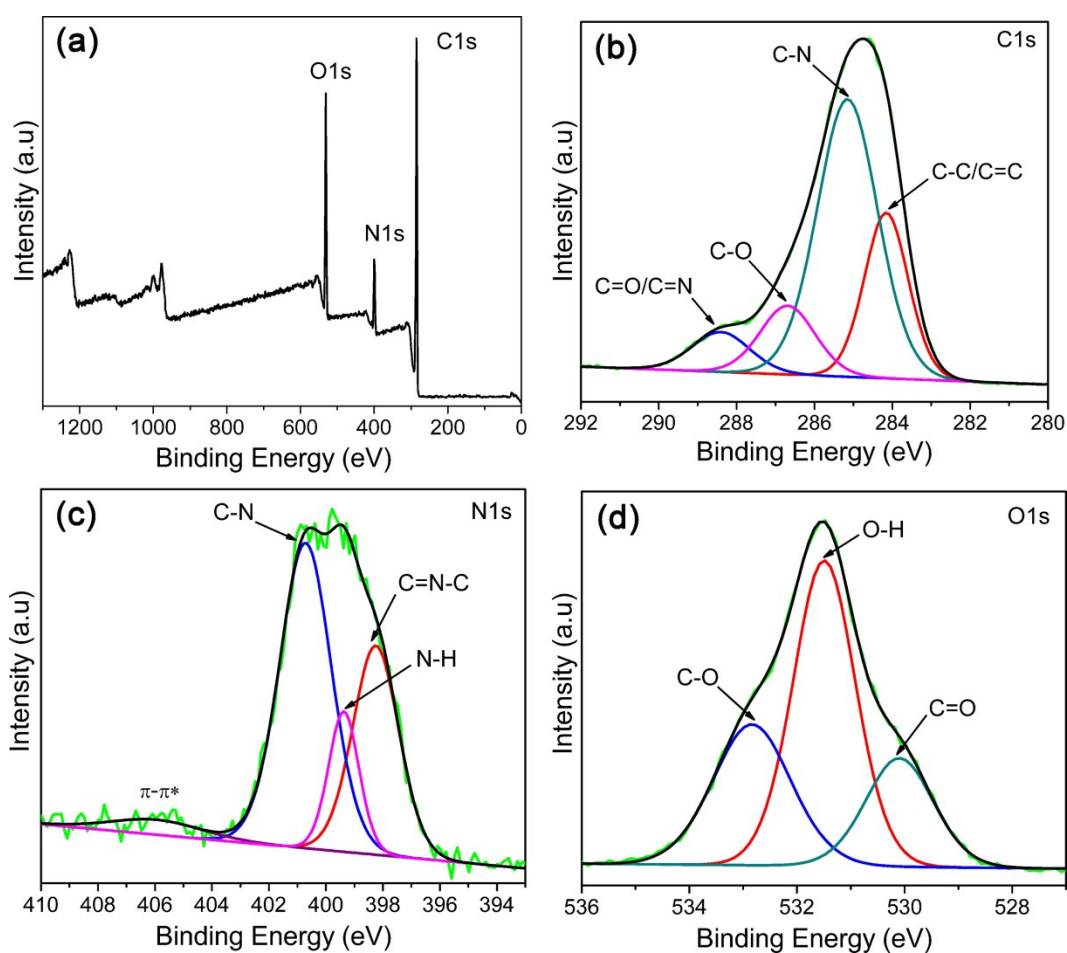

**Fig. S2** (a) Full-scan XPS and corresponding high-resolution (b) C1s, (c) N1s and (d) O1s XPS spectra of CDs.

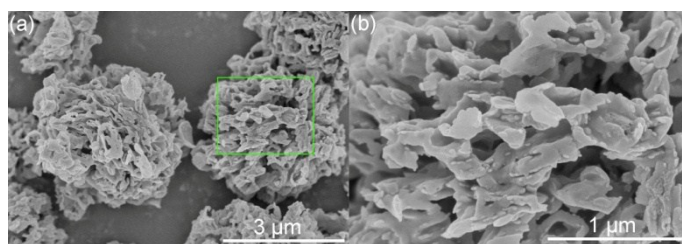

**Fig. S3** (a) SEM and (b) high-resolution SEM images of CDs-1.6/C<sub>3</sub>N<sub>4</sub>.

**Table S1**

Element compositions of CDs, g-C<sub>3</sub>N<sub>4</sub> and CDs-1.6/C<sub>3</sub>N<sub>4</sub> calculated by their XPS spectra.

| Sample                                | C%    | N%    | O%    |
|---------------------------------------|-------|-------|-------|
| CDs                                   | 70.72 | 11.36 | 17.92 |
| g-C <sub>3</sub> N <sub>4</sub>       | 44.45 | 54.39 | 1.16  |
| CDs-1.6/C <sub>3</sub> N <sub>4</sub> | 45.60 | 53.14 | 1.26  |

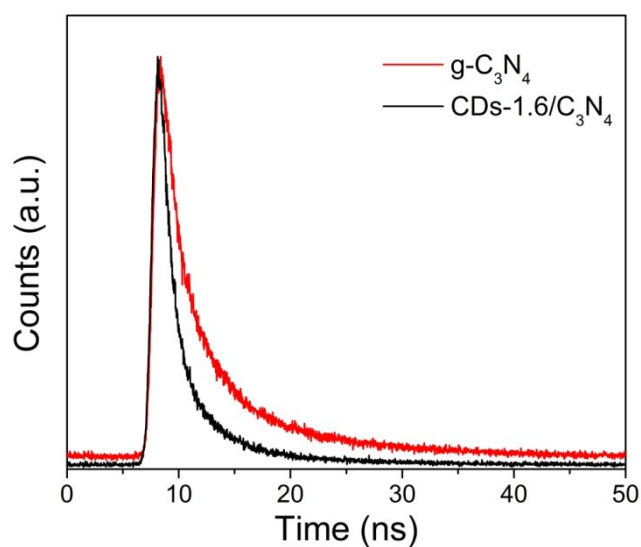

**Fig S4** Time-resolved transient PL decay curves of g-C<sub>3</sub>N<sub>4</sub> and CDs-1.6/C<sub>3</sub>N<sub>4</sub> samples under the excitation wavelength of 405 nm.

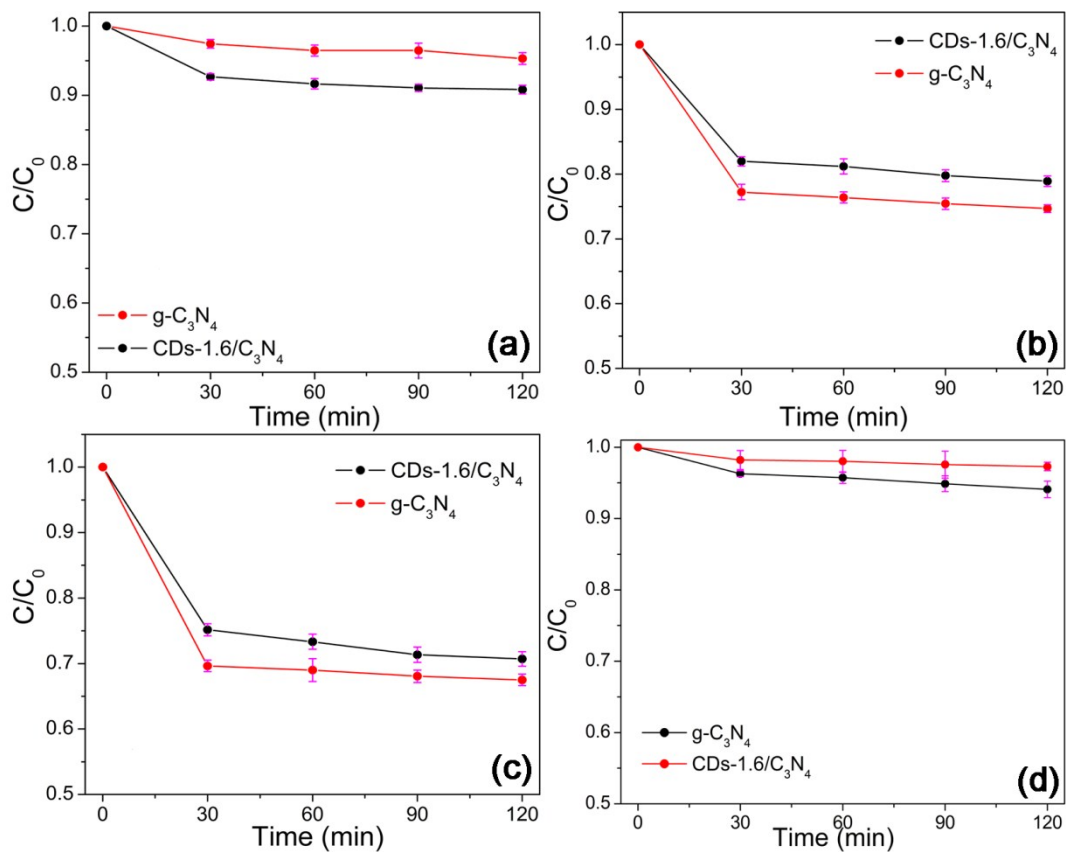

**Fig S5** The absorption behaviors of  $g-C_3N_4$  and  $CDs-1.6/C_3N_4$  towards various pollutants of (a) MO, (b) MB, (c) RhB and (d) p-NP.

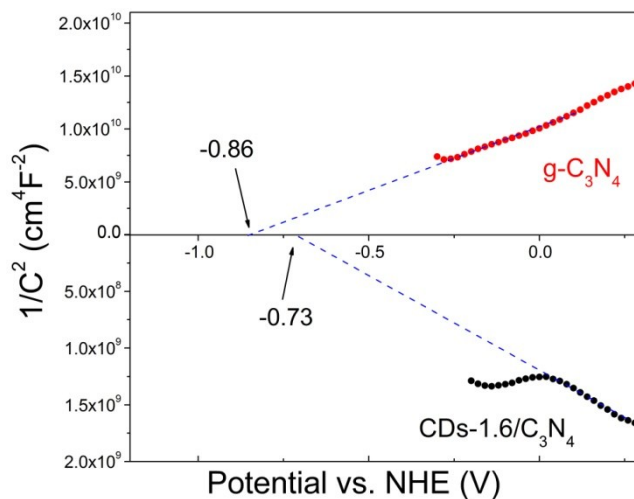

**Fig. S6** Mott-Schottky plots of  $g-C_3N_4$  and  $CDs-1.6/C_3N_4$ .

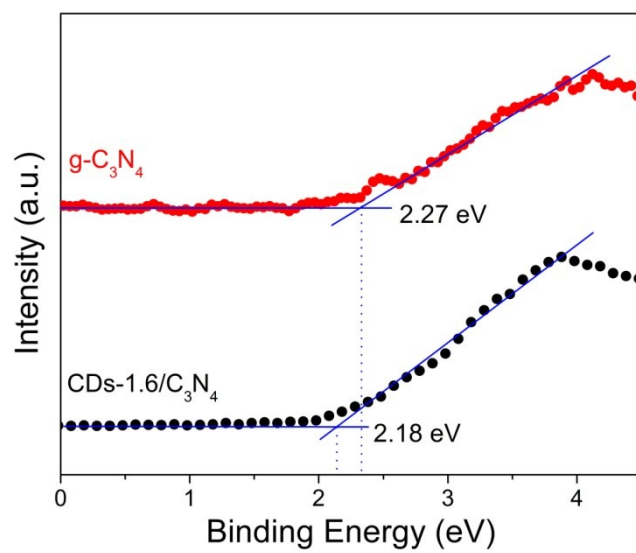

**Fig. S7** VB XPS spectra of  $g\text{-C}_3\text{N}_4$  and  $\text{CDs-1.6/C}_3\text{N}_4$ .
